# Supplementary material for: Toward a theoretical understanding of young female cancer survivors’ decision-making about family-building post-treatment
Source: Springer Nature journal article supplement (doi:10.1007/s00520-020-05307-1), 2020-01-28
Supplement: MOESM1 [file 17602270]

**Supplemental Table.** Qualitative Interview Guide.

| **Section 1. Initial Illness Narrative and Background** |
| --- |
| - When did you first learn that cancer affected – or may have affected – your fertility?   *[Let the narrative go on as long as possible, with only simply prompting by asking, ‘What happened then? And then?’]*   - *How did that make you feel?* - Prompt, if not already mentioned: Was fertility preservation offered to you before you started your cancer treatment?   - *Prompting: What was that experience like for you? How do you feel about that experience?* - Since completing cancer, have you seen a doctor or specialist to test your fertility or learn about your family-building options?   - *Prompting: Can you tell me about that experience and what happened after? How did that make you feel? How do you feel about it now?*      - Have you been to any other type of healer or practitioner for your fertility? Can you tell me about that experience and what happened after?   - *Prompting: Can you tell me about that experience and what happened after? How did that make you feel? How do you feel about it now?*      - How else have you learned about your fertility or what your options for having a child might be?   - *Prompts: Searched on the internet? Talked to friends? Who have you spoken to?* - At this point in your life, to what extent have you considered having a child?   - *Prompting: What are your thoughts or concerns when you think about having a child [in the future, when you are ready]?*   - *Prompting: Has anyone ever spoken to you about what your options might be [such as using reproductive medicine or pursuing adoption]? If so, who has done so? When? How did this conversation make you feel? What happened after?* |
| **Section 2. Current Thoughts and Feelings Related to Fertility/Family-building** |
| - At this point, what are your beliefs about your fertility and reproductive potential? What thoughts do you have about your family-building options and your chances for success in having a child and building a family?   - *Prompting: To what extent do you feel family-building may be easy/difficult?* - At this point, how does thinking about your fertility and your options to have a child (or children/more children) make you feel?   - *Prompting: How do you manage the emotions that arise when thinking about your fertility? Is there someone in your life that you share these emotions with? Who? What is that like for you?* |
| **Section 3. Decision-making about Fertility/Family-building** |
| For people that received cancer treatments that are known to impact fertility or a woman’s ability to carry a pregnancy, having a child may need to include using assisted reproductive technology – such as IVF, using donated eggs or embryos, or using a surrogate or gestational carrier. Or people may need to pursue alternative options such as adoption or fostering.   - To what extent have you thought about your options for having a child and making decisions about family-buildling after cancer?   - *Prompting: What are the factors that you would consider when deciding about your options to have a child?* *How does thinking about these decisions make you feel?*   INFORMATION   - At this point, how informed do you feel about your fertility and your options for having a child (or more children)? *Can you tell me more about that?*      - How much do you feel you understand the benefits and risks of each choice (e.g., IVF with your own fresh or frozen eggs/embryos or donor eggs/embryos, surrogacy, adoption, or fostering)? - Have you pursue other sources of information or support to learn more about your options? *Prompting:*   - *What prompted you to access this information?*   - *Have you discussed fertility, fertility preservation, or other family-building options with loved ones? With who specifically? How did they react? Why might someone not want to discuss these topics with loved ones?*   - *Have you discussed fertility, fertility preservation, or other family-building options with your doctor or another healthcare provider? What did you think about the conversation(s) you had?*   - *Have you sought information from any other patient organizations or sources? Were they helpful; why or why not?* - If you are considering – or might need to consider – options that include reproductive medicine or adoption: To what extent do you feel informed about the financial cost of these options? Are you concerned about the cost?   - *Prompting: Has this impacted your decision-making? How do you balance financial stress with your desire to have a child?*   VALUES-CLARITY   - Do you feel you have a good understanding of what matters most to you when you think about your options for having a child and decisions ahead? - What are the factors you consider when deciding what matters most to you when thinking about these decisions?      - If partnered: To what extent have you and your partner discussed what matters most to you when thinking about these decisions? *Prompting: Do you agree/disagree on these issues? In what ways have you managed that?*   SUPPORT   - How much support do you feel you have to make decisions about family-building?   - Do you feel like you need more support? Whattypes of support?   - Do you feel like you have a good sense of what other important people in your life think you should do? *Probes: partners, loved ones, doctors*   - Do you feel any social pressure to make one choice or another? Please explain what kind of pressure you feel, where it comes from, and how it makes you feel? Would anything help you handle or cope with that pressure?   DECISION SELF-EFFICACY / READINESS   - At this time, how confident do you feel that you would be able to make a decision and pursue whichever option you ultimately decide is best for you?   - - *Prompting: What are the reasons for you feeling this way? What makes you feel confident/not confident you would be able to pursue your desired family-building plan? What makes you feel confident/not confident you will eventually be able to have a child?* |

| **Section 4: Decision support needs and preferences for support services** |
| --- |
| These findings are being prepared and will be reported in a separate manuscript. |
